# Supplementary material
Source: MDPI journal article supplement (https://www.mdpi.com/2304-6740/5/4/79)

# checkCIF/PLATON report

You have not supplied any structure factors. As a result the full set of tests cannot be run.

THIS REPORT IS FOR GUIDANCE ONLY. IF USED AS PART OF A REVIEW PROCEDURE FOR PUBLICATION, IT SHOULD NOT REPLACE THE EXPERTISE OF AN EXPERIENCED CRYSTALLOGRAPHIC REFEREE.

No syntax errors found.      CIF dictionary      Interpreting this report

## Datablock: compound3

---

Bond precision:    C-C = 0.0086 Å

Wavelength=0.71075

Cell:                a=12.6367(7)                b=16.9170(6)                c=20.4887(10)  
                      alpha=91.3815(14)    beta=105.252(2)    gamma=109.642(3)  
Temperature:    103 K

|                | Calculated                       | Reported                         |
|----------------|----------------------------------|----------------------------------|
| Volume         | 3949.2(3)                        | 3949.2(3)                        |
| Space group    | P -1                             | P -1                             |
| Hall group     | -P 1                             | -P 1                             |
| Moiety formula | C62 H108 Cl4 Ge2 Si9, C4<br>H8 O | C62 H108 Cl4 Ge2 Si9, C4<br>H8 O |
| Sum formula    | C66 H116 Cl4 Ge2 O Si9           | C66 H116 Cl4 Ge2 O Si9           |
| Mr             | 1465.42                          | 1465.37                          |
| Dx,g cm-3      | 1.232                            | 1.232                            |
| Z              | 2                                | 2                                |
| Mu (mm-1)      | 1.070                            | 1.070                            |
| F000           | 1556.0                           | 1556.0                           |
| F000'          | 1559.52                          |                                  |
| h,k,lmax       | 15,20,24                         | 15,20,24                         |
| Nref           | 14713                            | 14641                            |
| Tmin,Tmax      | 0.938,0.958                      | 0.939,0.958                      |
| Tmin'          | 0.938                            |                                  |

Correction method= # Reported T Limits: Tmin=0.939 Tmax=0.958

AbsCorr = MULTI-SCAN

Data completeness= 0.995

Theta(max)= 25.500

R(reflections)= 0.0683( 10301)

wR2(reflections)= 0.1359( 14641)

S = 1.117

Npar= 767

---

The following ALERTS were generated. Each ALERT has the format

**test-name\_ALERT\_alert-type\_alert-level.**

Click on the hyperlinks for more details of the test.

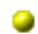

#### Alert level C

|                   |                                                  |         |        |
|-------------------|--------------------------------------------------|---------|--------|
| PLAT094_ALERT_2_C | Ratio of Maximum / Minimum Residual Density .... | 2.84    | Report |
| PLAT213_ALERT_2_C | Atom C68 has ADP max/min Ratio .....             | 3.4     | prolat |
| PLAT220_ALERT_2_C | Non-Solvent Resd 1 C Ueq(max)/Ueq(min) Range     | 3.7     | Ratio  |
| PLAT222_ALERT_3_C | Non-Solvent Resd 1 H Uiso(max)/Uiso(min) Range   | 4.3     | Ratio  |
| PLAT242_ALERT_2_C | Low 'MainMol' Ueq as Compared to Neighbors of    | C28     | Check  |
| PLAT243_ALERT_4_C | High 'Solvent' Ueq as Compared to Neighbors of   | C64     | Check  |
| PLAT341_ALERT_3_C | Low Bond Precision on C-C Bonds .....            | 0.00864 | Ang.   |
| PLAT601_ALERT_2_C | Structure Contains Solvent Accessible VOIDS of . | 35      | Ang3   |

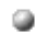

#### Alert level G

|                   |                                                            |       |        |
|-------------------|------------------------------------------------------------|-------|--------|
| PLAT066_ALERT_1_G | Predicted and Reported Tmin&Tmax Range Identical           | ?     | Check  |
| PLAT083_ALERT_2_G | SHELXL Second Parameter in WGHT Unusually Large            | 15.58 | Why ?  |
| PLAT301_ALERT_3_G | Main Residue Disorder .....(Resd 1)..                      | 4%    | Note   |
| PLAT398_ALERT_2_G | Deviating C-O-C Angle from 120 Deg for O1                  | 106.9 | Degree |
| PLAT790_ALERT_4_G | Centre of Gravity not Within Unit Cell: Resd. #<br>C4 H8 O | 2     | Note   |
| PLAT933_ALERT_2_G | Number of OMIT Records in Embedded .res File ...           | 5     | Note   |

0 **ALERT level A** = Most likely a serious problem - resolve or explain  
0 **ALERT level B** = A potentially serious problem, consider carefully  
8 **ALERT level C** = Check. Ensure it is not caused by an omission or oversight  
6 **ALERT level G** = General information/check it is not something unexpected

1 ALERT type 1 CIF construction/syntax error, inconsistent or missing data  
8 ALERT type 2 Indicator that the structure model may be wrong or deficient  
3 ALERT type 3 Indicator that the structure quality may be low  
2 ALERT type 4 Improvement, methodology, query or suggestion  
0 ALERT type 5 Informative message, check

## Datablock: compound5

Bond precision: C-C = 0.0085 A

Wavelength=0.71075

|              |                 |                |                 |
|--------------|-----------------|----------------|-----------------|
| Cell:        | a=11.6792(2)    | b=15.7581(3)   | c=24.7906(5)    |
|              | alpha=76.264(1) | beta=88.080(1) | gamma=70.251(1) |
| Temperature: | 103 K           |                |                 |

|                | Calculated                     | Reported                        |
|----------------|--------------------------------|---------------------------------|
| Volume         | 4165.89(14)                    | 4165.89(14)                     |
| Space group    | P -1                           | P -1                            |
| Hall group     | -P 1                           | -P 1                            |
| Moiety formula | C62 H108 Cl2 Ge2 Si8, 2(C6 H6) | C62 H108 Cl2 Ge2 Si8, 2 (C6 H6) |
| Sum formula    | C74 H120 Cl2 Ge2 Si8           | C74 H120 Cl2 Ge2 Si8            |
| Mr             | 1450.55                        | 1450.49                         |
| Dx,g cm-3      | 1.156                          | 1.156                           |
| Z              | 2                              | 2                               |
| Mu (mm-1)      | 0.937                          | 0.937                           |
| F000           | 1548.0                         | 1548.0                          |
| F000'          | 1550.78                        |                                 |
| h,k,lmax       | 13,18,29                       | 13,18,29                        |
| Nref           | 14665                          | 14555                           |
| Tmin,Tmax      | 0.914,0.972                    | 0.914,0.972                     |
| Tmin'          | 0.911                          |                                 |

Correction method= # Reported T Limits: Tmin=0.914 Tmax=0.972  
AbsCorr = MULTI-SCAN

Data completeness= 0.992                      Theta(max)= 25.000

R(reflections)= 0.0637( 13024)              wR2(reflections)= 0.1311( 14555)

S = 1.289                                      Npar= 805

The following ALERTS were generated. Each ALERT has the format  
**test-name\_ALERT\_alert-type\_alert-level.**  
Click on the hyperlinks for more details of the test.

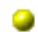

#### Alert level C

|                         |                                                  |              |
|-------------------------|--------------------------------------------------|--------------|
| PLAT243_ALERT_4_C High  | 'Solvent' Ueq as Compared to Neighbors of        | C67 Check    |
| PLAT244_ALERT_4_C Low   | 'Solvent' Ueq as Compared to Neighbors of        | C68 Check    |
| PLAT250_ALERT_2_C Large | U3/U1 Ratio for Average U(i,j) Tensor ....       | 3.0 Note     |
| PLAT331_ALERT_2_C Small | Average Phenyl C-C Dist. C69 -C71_a              | 1.37 Ang.    |
| PLAT341_ALERT_3_C Low   | Bond Precision on C-C Bonds .....                | 0.00849 Ang. |
| PLAT601_ALERT_2_C       | Structure Contains Solvent Accessible VOIDS of . | 32 Ang3      |

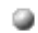

#### Alert level G

|                   |                                                  |              |
|-------------------|--------------------------------------------------|--------------|
| PLAT066_ALERT_1_G | Predicted and Reported Tmin&Tmax Range Identical | ? Check      |
| PLAT083_ALERT_2_G | SHELXL Second Parameter in WGHT Unusually Large  | 10.84 Why ?  |
| PLAT154_ALERT_1_G | The s.u.'s on the Cell Angles are Equal ..(Note) | 0.001 Degree |
| PLAT933_ALERT_2_G | Number of OMIT Records in Embedded .res File ... | 3 Note       |

- 0 **ALERT level A** = Most likely a serious problem - resolve or explain
- 0 **ALERT level B** = A potentially serious problem, consider carefully
- 6 **ALERT level C** = Check. Ensure it is not caused by an omission or oversight
- 4 **ALERT level G** = General information/check it is not something unexpected

2 ALERT type 1 CIF construction/syntax error, inconsistent or missing data  
5 ALERT type 2 Indicator that the structure model may be wrong or deficient  
1 ALERT type 3 Indicator that the structure quality may be low  
2 ALERT type 4 Improvement, methodology, query or suggestion  
0 ALERT type 5 Informative message, check

---

It is advisable to attempt to resolve as many as possible of the alerts in all categories. Often the minor alerts point to easily fixed oversights, errors and omissions in your CIF or refinement strategy, so attention to these fine details can be worthwhile. In order to resolve some of the more serious problems it may be necessary to carry out additional measurements or structure refinements. However, the purpose of your study may justify the reported deviations and the more serious of these should normally be commented upon in the discussion or experimental section of a paper or in the "special\_details" fields of the CIF. checkCIF was carefully designed to identify outliers and unusual parameters, but every test has its limitations and alerts that are not important in a particular case may appear. Conversely, the absence of alerts does not guarantee there are no aspects of the results needing attention. It is up to the individual to critically assess their own results and, if necessary, seek expert advice.

### **Publication of your CIF in IUCr journals**

A basic structural check has been run on your CIF. These basic checks will be run on all CIFs submitted for publication in IUCr journals (*Acta Crystallographica*, *Journal of Applied Crystallography*, *Journal of Synchrotron Radiation*); however, if you intend to submit to *Acta Crystallographica Section C* or *E* or *IUCrData*, you should make sure that full publication checks are run on the final version of your CIF prior to submission.

### **Publication of your CIF in other journals**

Please refer to the *Notes for Authors* of the relevant journal for any special instructions relating to CIF submission.

---

**PLATON version of 13/08/2017; check.def file version of 27/07/2017**

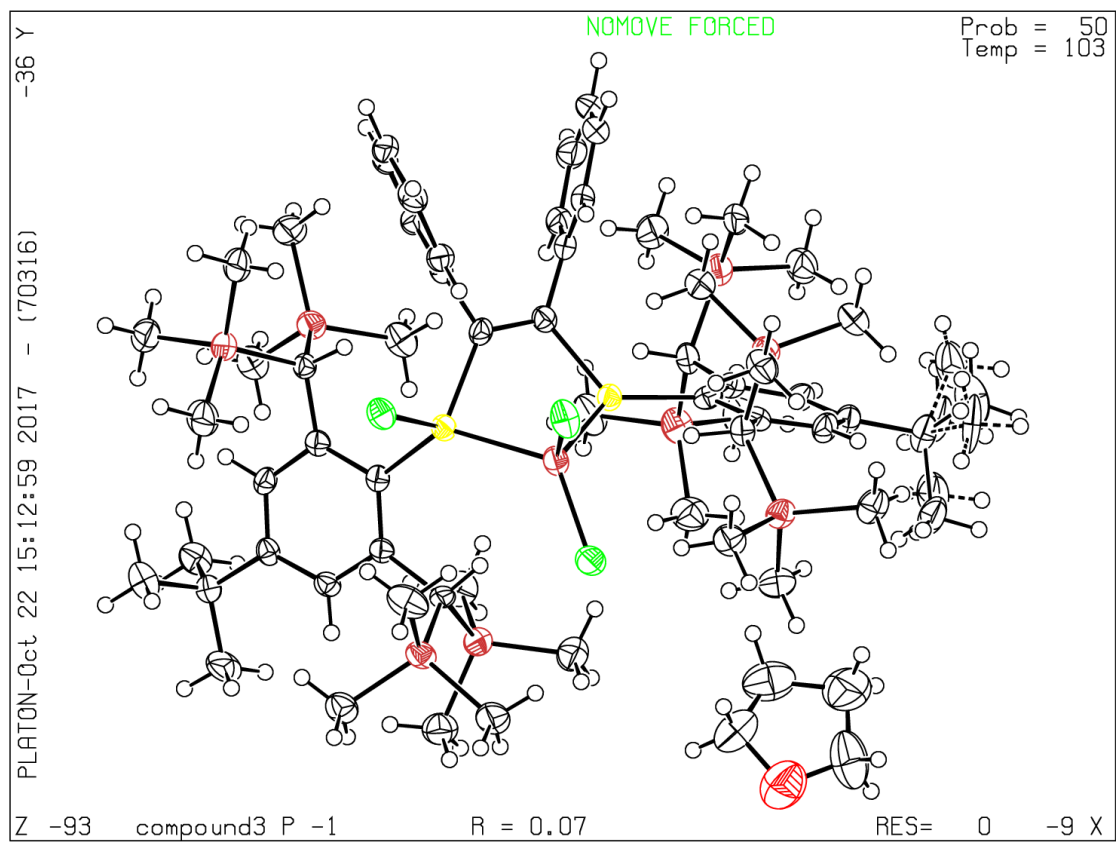

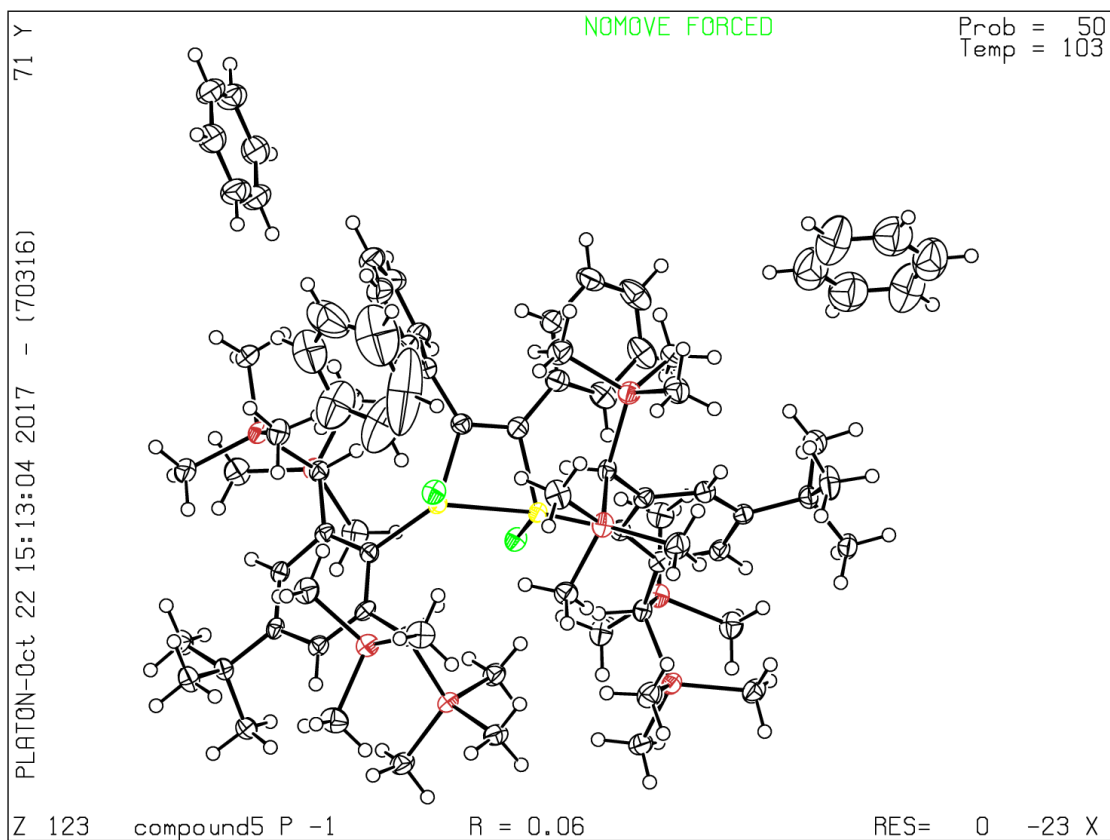

Supplement: s1 [file s1]
