# Supplementary material
Source: MDPI journal article supplement (https://www.mdpi.com/2304-6740/5/4/79)
Supplement: s1 [file s1]

# Supporting Information

## **Synthesis of a Dichlorodigermasilane: Double Si–Cl Activation by a Ge=Ge unit.**

Tomohiro Sugahara,<sup>1</sup> Norihiro Tokitoh<sup>1</sup> and Takahiro Sasamori,<sup>2,\*</sup>

<sup>1</sup> Institute for Chemical Research, Kyoto University, Gokasho Uji, Kyoto 611-0011, Japan

<sup>2</sup> Graduate School of Natural Sciences, Nagoya City University,  
Yamanohata 1, Mizuho-cho, Mizuho-ku, Nagoya, Aichi 467-8501, Japan

E-mail: sasamori@nsc.nagoya-cu.ac.jp

Tel: +81-52-872-5820

## NMR Data

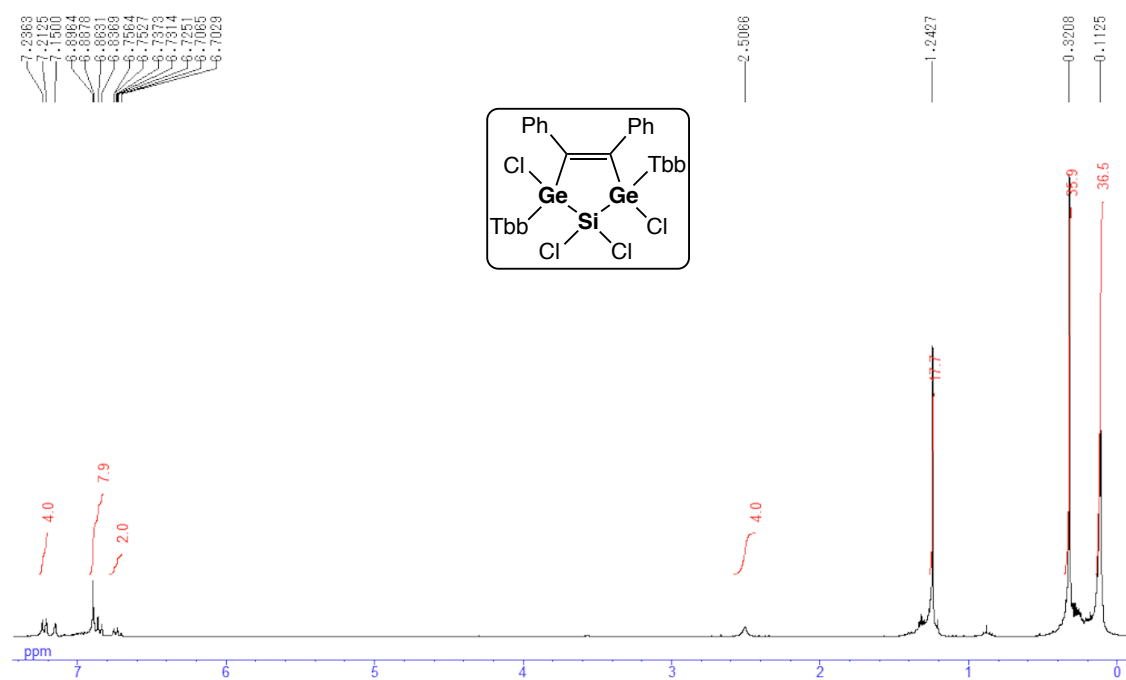

Figure S1. <sup>1</sup>H NMR spectrum of **3** in C<sub>6</sub>D<sub>6</sub>.

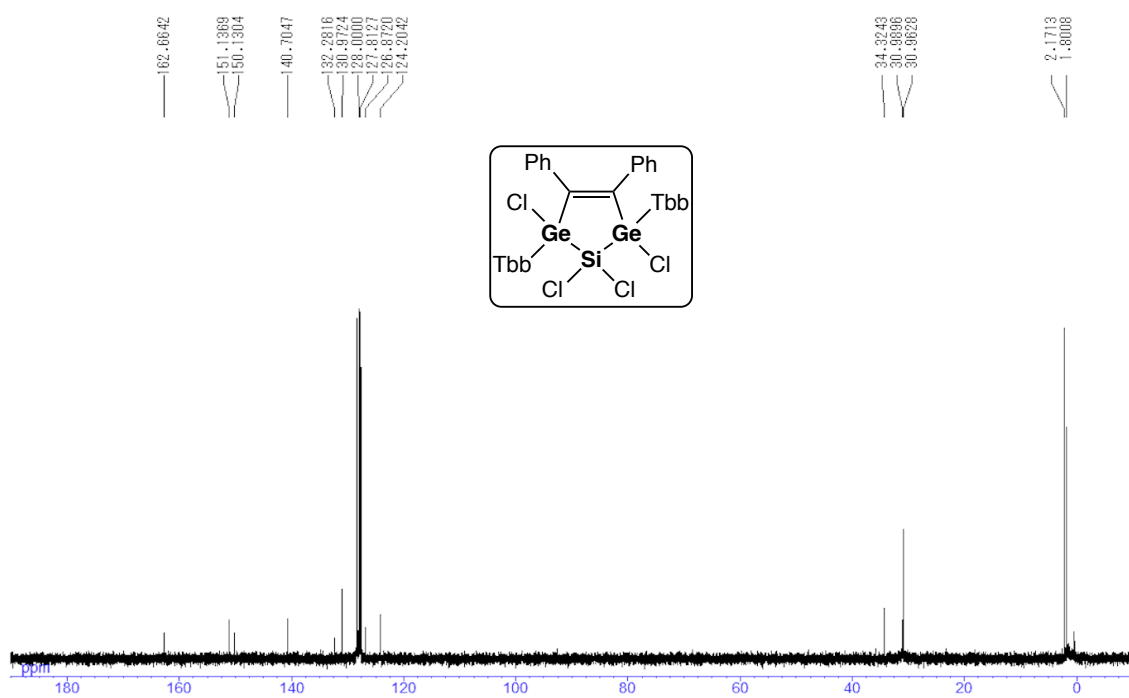

Figure S2. <sup>13</sup>C NMR spectrum of **3** in C<sub>6</sub>D<sub>6</sub>

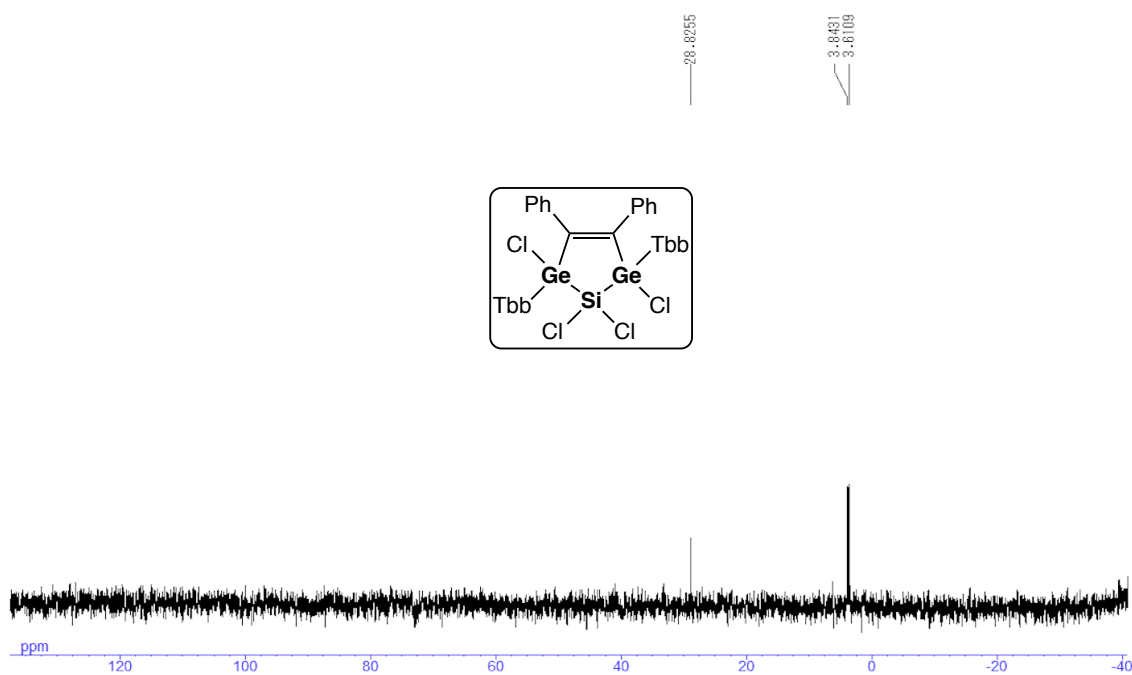

**Figure S3.** <sup>29</sup>Si NMR spectrum of **3** in C<sub>6</sub>D<sub>6</sub>.

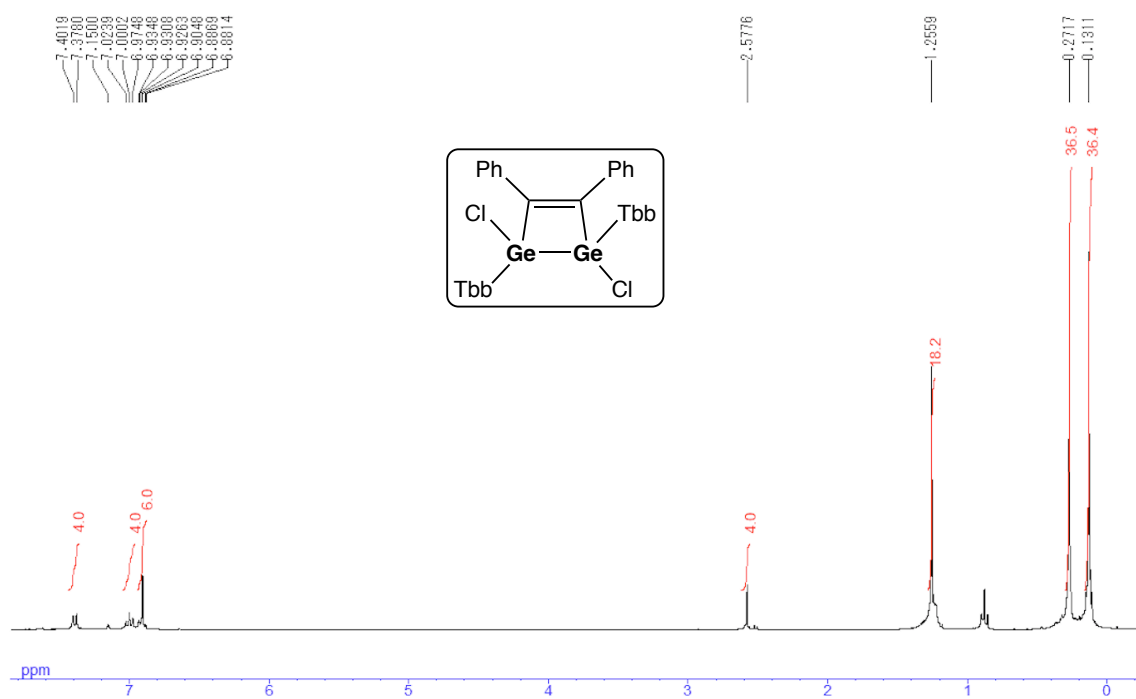

**Figure S4.** <sup>1</sup>H NMR spectrum of **5** in C<sub>6</sub>D<sub>6</sub>.

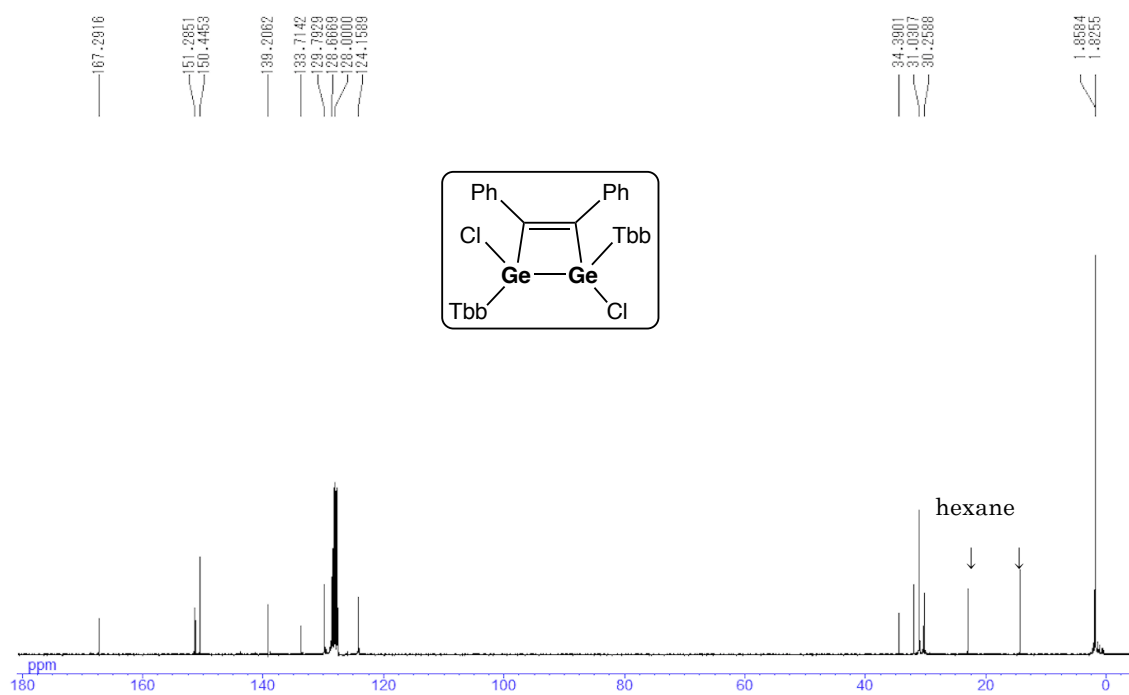

**Figure S5.**  $^{13}\text{C}$  NMR spectrum of **5** in  $\text{C}_6\text{D}_6$ .
